# Supplementary material for: Construction of organometallic trefoil knots and one-dimensional chains featuring half-sandwich Cp*Rh corner units and an abnormal zwitterion ligand
Source: Royal Society of Chemistry journal article supplement (doi:10.1039/d0qo01279c), 2020-11-11
Supplement: d0qo01279c1.pdf [file d0qo01279c1.pdf]

**Template-Free Self-Assembly of molecular Trefoil knots and 1D metallasupramolecular chain featuring half-sandwich Cp\*·Rh building blocks.**

Xiang Gao<sup>a</sup>, Zheng Cui<sup>a</sup>, Yue-Jian Lin<sup>a</sup> and Guo-Xin Jin<sup>a\*</sup>

a: State Key Laboratory of Molecular Engineering of Polymers, Shanghai Key Laboratory of Molecular Catalysis and Innovative Materials, Department of Chemistry, Fudan University, Shanghai 200433, P. R. China

\*E-mail: [gxjin@fudan.edu.cn](mailto:gxjin@fudan.edu.cn)

# Table of Contents

|                                                          |   |
|----------------------------------------------------------|---|
| General experimental information.....                    | 2 |
| ESI-TOF-MS data of 2-mono.....                           | 2 |
| NMR Spectra.....                                         | 3 |
| Crystal data and structure refinement for complexes..... | 9 |

## General experimental information

All the chemicals were purchased from the commercial companies and used as obtained unless otherwise mentioned.  $[\text{Cp}^*\text{RhCl}_2]_2$  ( $\text{Cp}^* = \eta^5\text{-pentamethyl-cyclopentadienyl}$ ) were synthesized according to the previously published procedure<sup>1</sup>. NMR spectra were performed on a Bruker AVANCE I 400 spectrometer at room temperature and referenced to the signal of the residual protonated solvent. Proton chemical shifts are reported relative to the solvent residual peak ( $\delta\text{H} = 3.31$  ppm for  $\text{CD}_3\text{OD}$ ), Elemental analyses (C, H, N) were carried out on an Elemental Vario EL III analyzer.

## ESI-TOF-MS data of 2-mono.

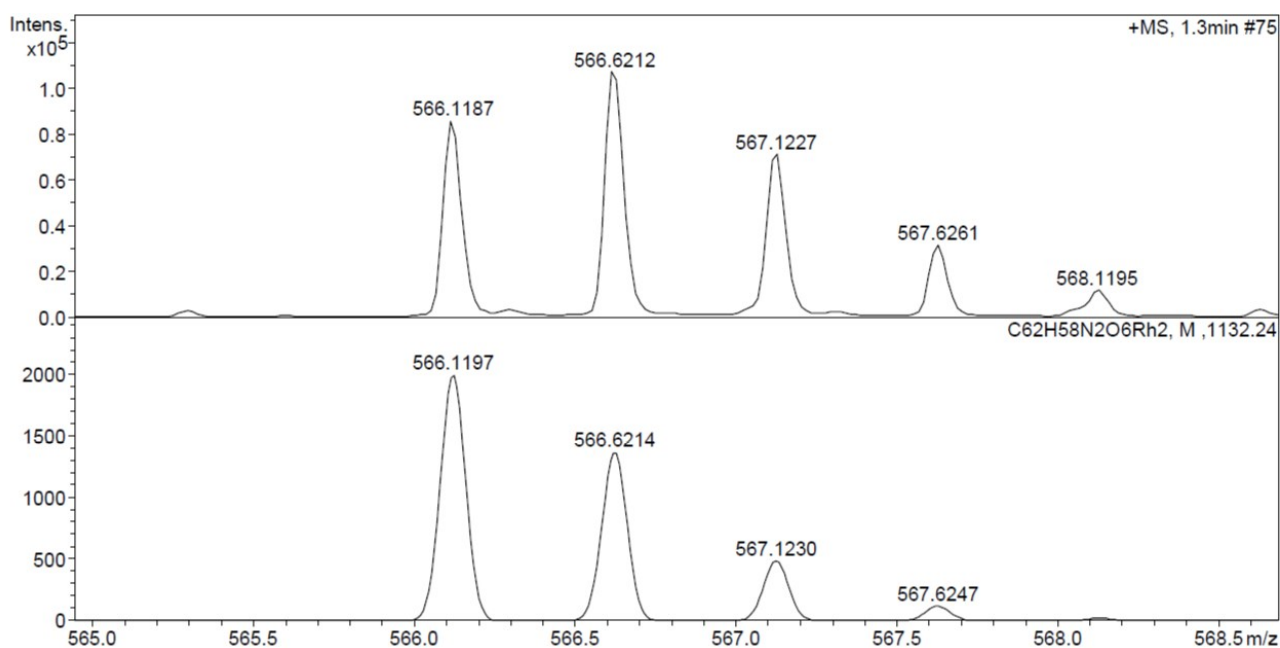

**Fig.S1** Calculated (bottom, red) and experimental (top, blue) ESI-TOF-MS spectrum (2+) of complex **2-mono**.

# NMR Spectra

## 1. Spectra of Ligand L (400 MHz, CD<sub>3</sub>OD).

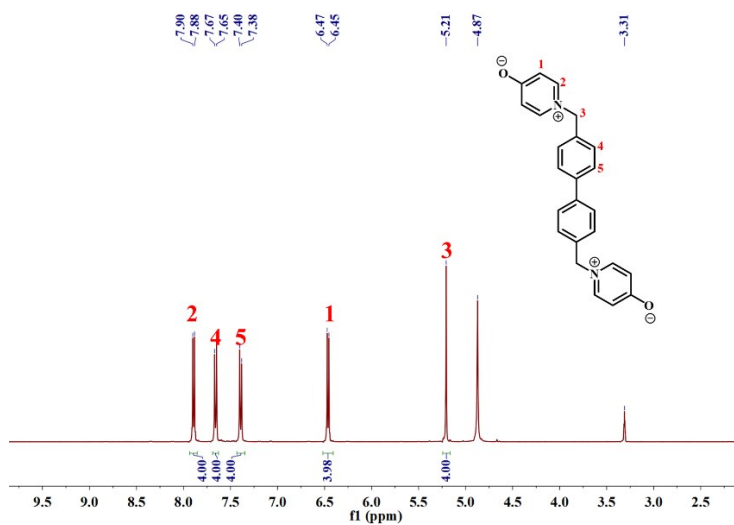

Fig.S2 <sup>1</sup>H NMR spectrum of ligand L.

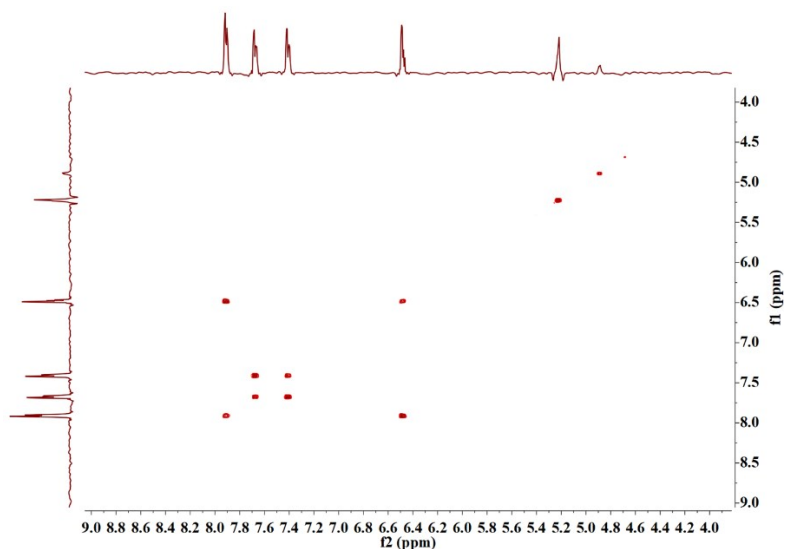

Fig.S3 <sup>1</sup>H-<sup>1</sup>H COSY spectrum of ligand L.

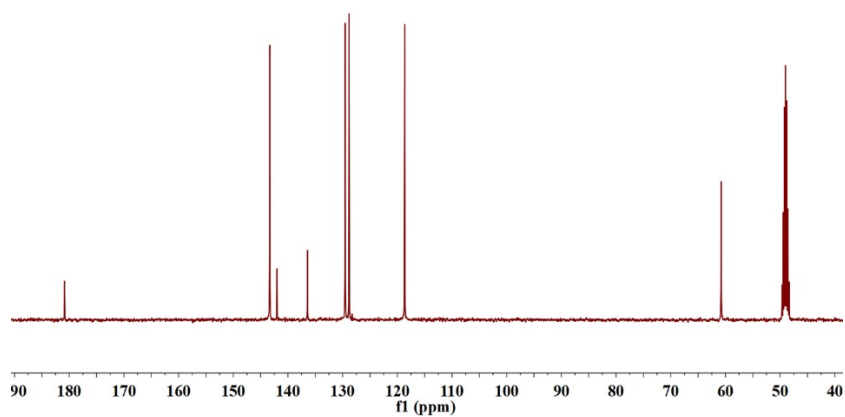

Fig.S4 <sup>13</sup>C NMR spectrum of ligand L.

## 2. Spectra of Trefoil knot 1 (400 MHz, CD<sub>3</sub>OD).

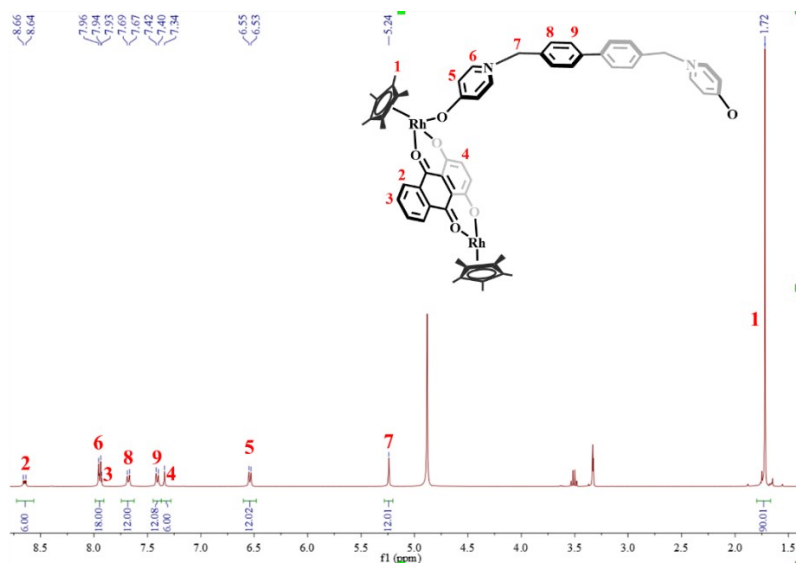

Fig.S5 <sup>1</sup>H NMR spectrum of trefoil knot 1.

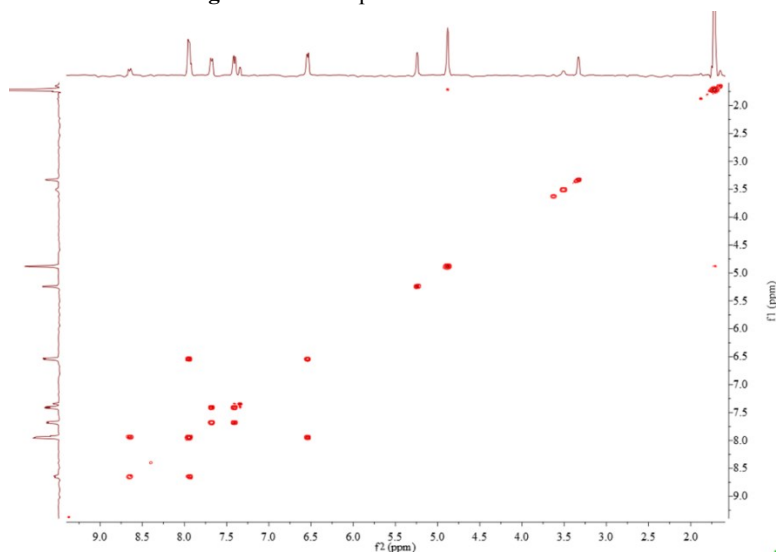

Fig.S6 <sup>1</sup>H-<sup>1</sup>H COSY NMR spectrum of trefoil knot 1.

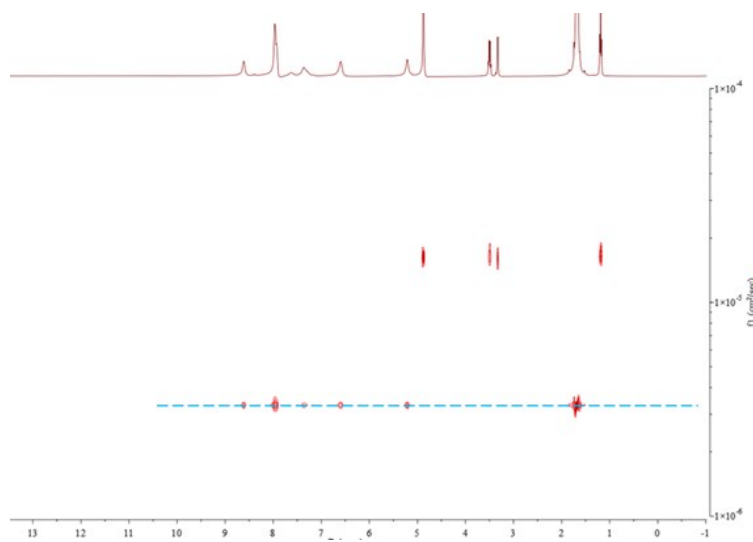

Fig.S7 <sup>1</sup>H DOSY NMR of trefoil knot 1.

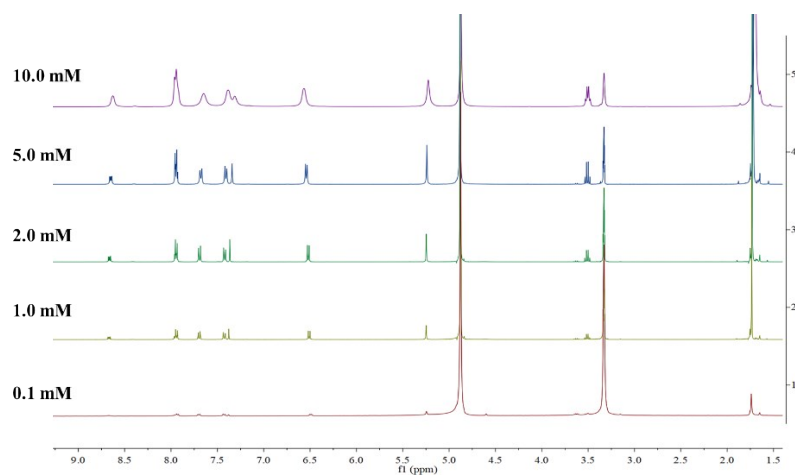

Fig.S8 Dilution experiments of trefoil knot **1** from 10.0 mM to 0.1 mM.

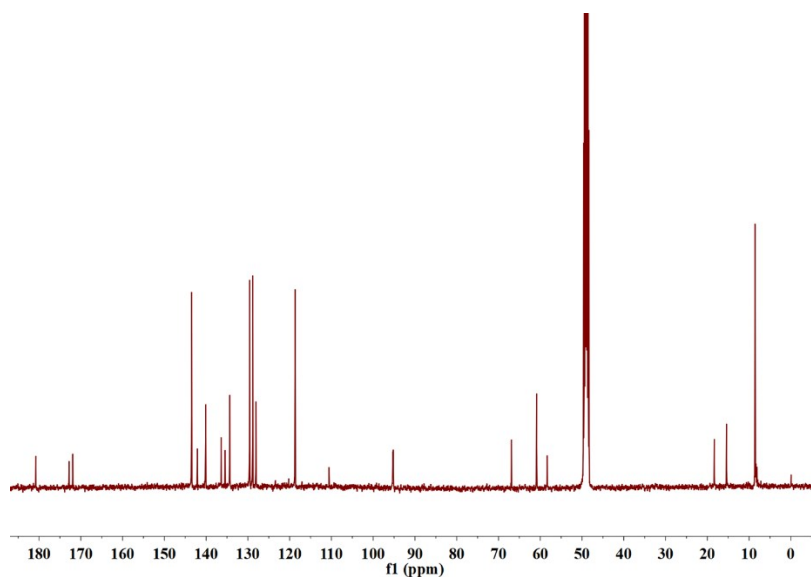

Fig.S9  $^{13}\text{C}$  NMR spectrum of trefoil knot **1**.

### 3. Spectra of Trefoil knot **2** (400 MHz, $\text{CD}_3\text{OD}$ ).

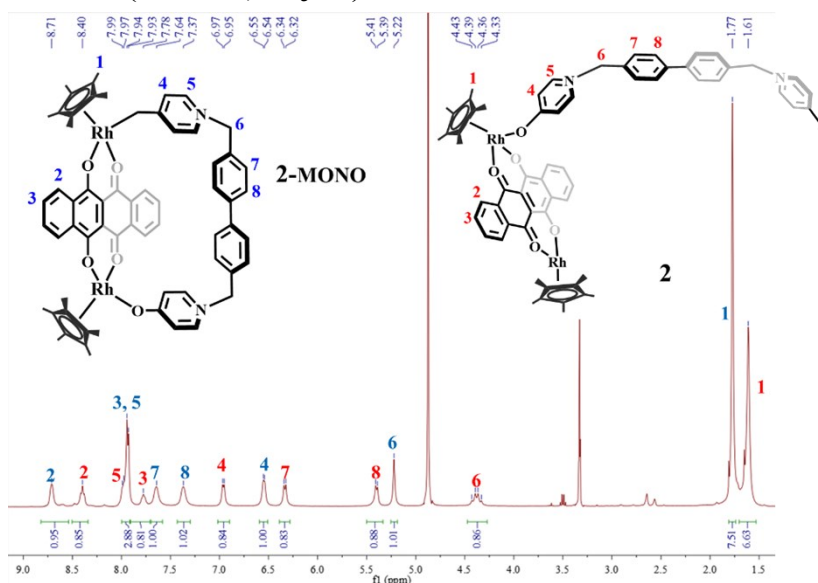

Fig.S10  $^1\text{H}$  NMR spectrum of trefoil knot **2** and **2-MONO**.

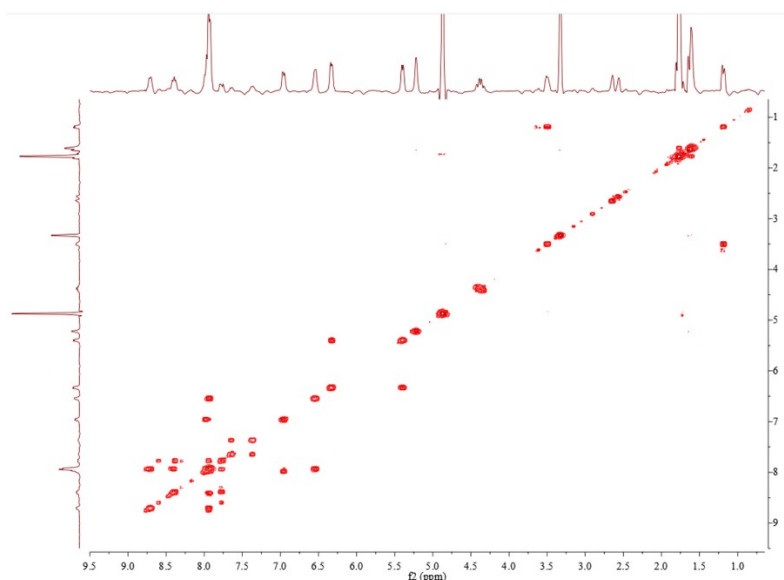

**Fig.S11**  $^1\text{H}$ - $^1\text{H}$  COSY NMR spectrum of trefoil knot **2** and **2-MONO**.

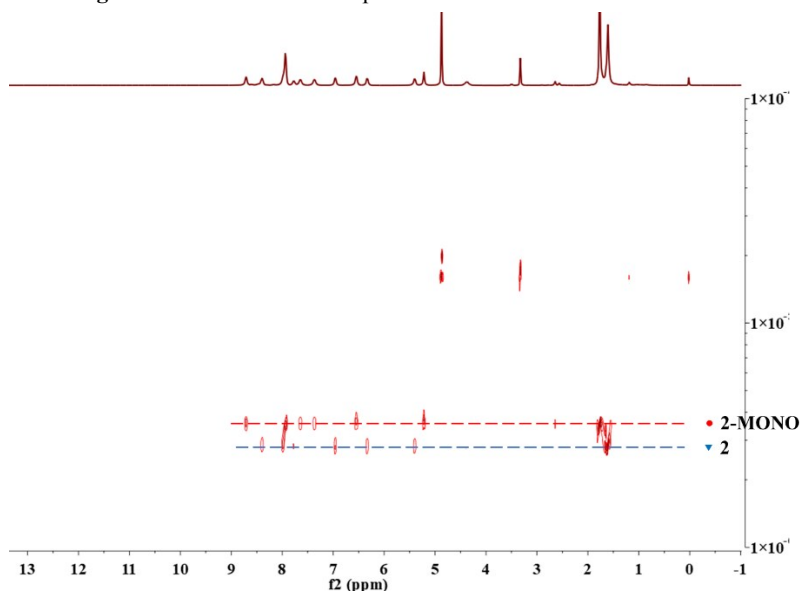

**Fig.S12**  $^1\text{H}$  DOSY NMR of trefoil knot **2** and **2-MONO**.

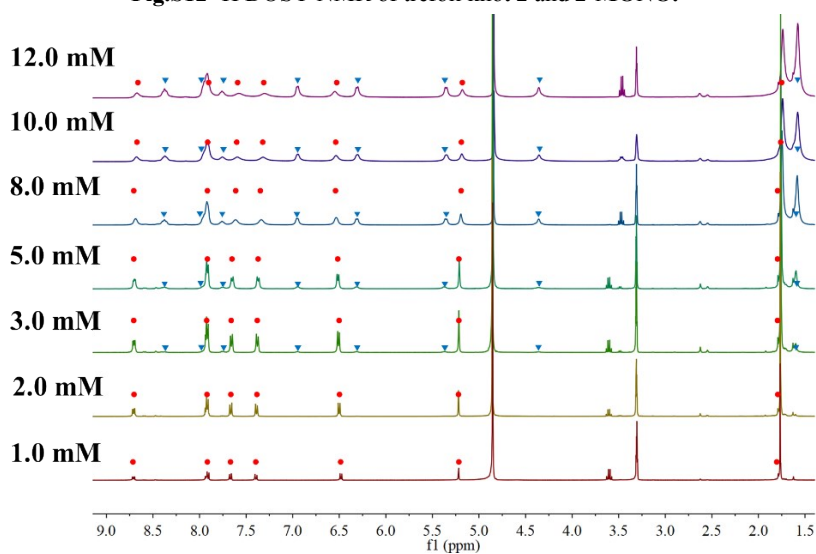

**Fig.S13** Dilution experiments of trefoil knot **2** from 10.0 mM to 1.0 mM.

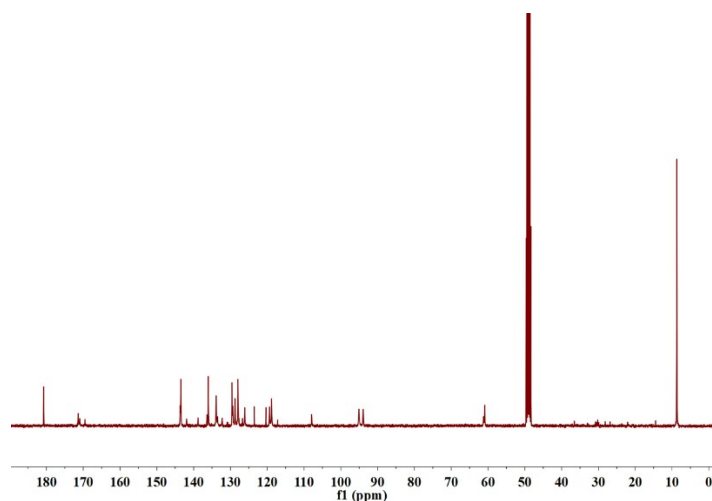

Fig.S14  $^{13}\text{C}$  NMR spectrum of trefoil knot 2.

4. Spectra of one-dimension chain 3 (400 MHz,  $\text{CD}_3\text{OD}$ ).

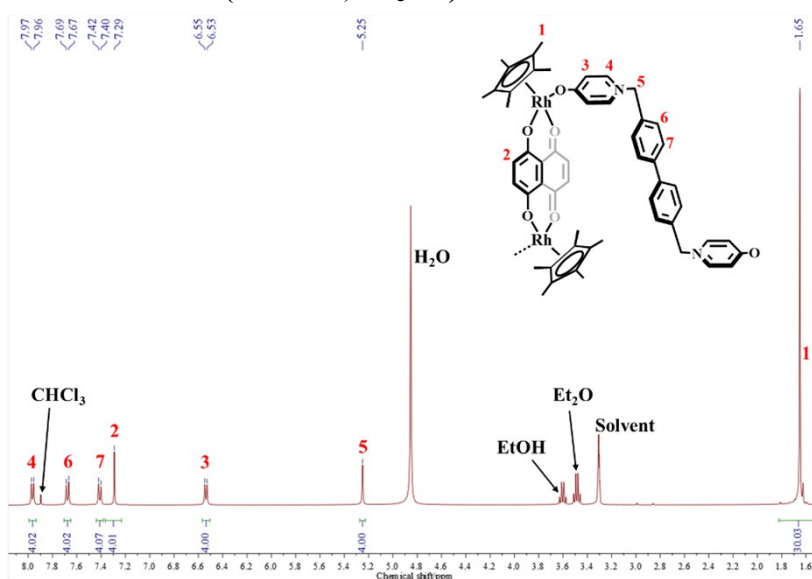

Fig.S15  $^1\text{H}$  NMR spectrum of 1D-chain 3.

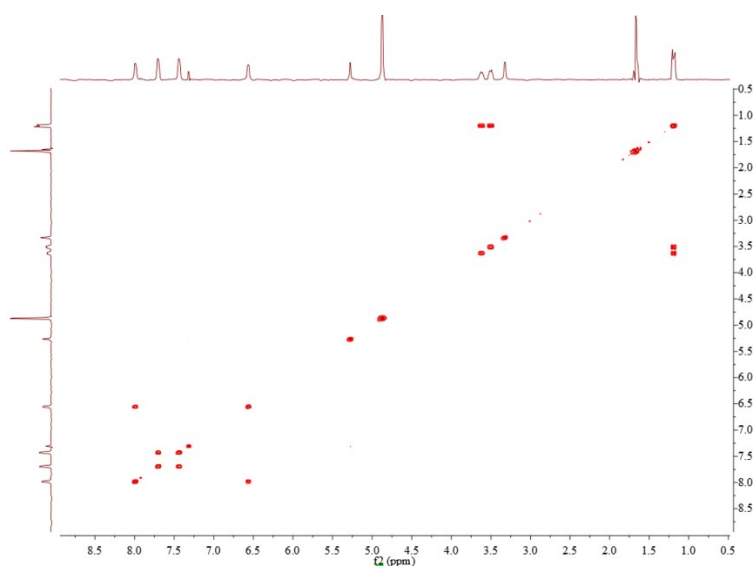

Fig.S16  $^1\text{H}$ - $^1\text{H}$  COSY NMR spectrum of 1D-chain 3.

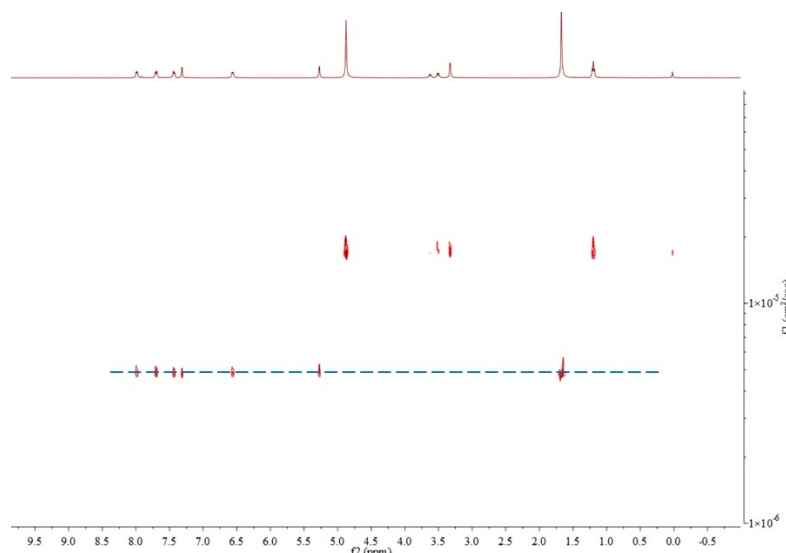

**Fig.S17**  $^1\text{H}$  DOSY NMR of 1D-chain 3.

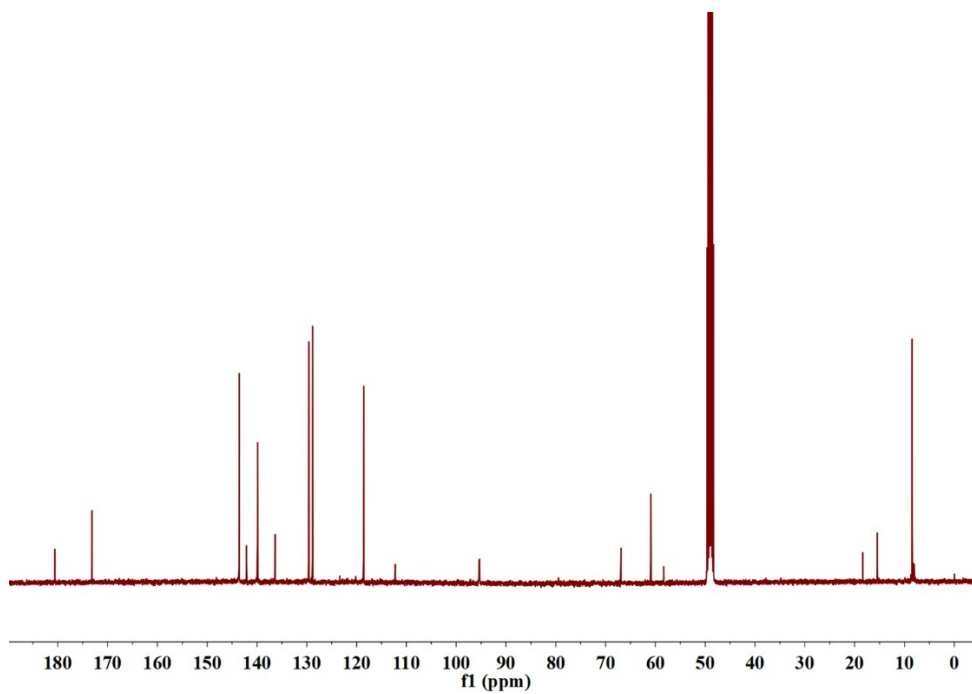

**Fig.S18**  $^{13}\text{C}$  spectrum of 1D-chain 3.



## Crystal data and structure refinement for complexes

**Table 1: Crystal data and structure refinement for trefoil knot 1.**

|                                   |                                                                                                                 |                 |
|-----------------------------------|-----------------------------------------------------------------------------------------------------------------|-----------------|
| Empirical formula                 | C <sub>192</sub> H <sub>240</sub> F <sub>18</sub> N <sub>6</sub> O <sub>60</sub> Rh <sub>6</sub> S <sub>6</sub> |                 |
| Formula weight                    | 4743.71                                                                                                         |                 |
| Temperature                       | 173(2) K                                                                                                        |                 |
| Wavelength                        | 1.34138 Å                                                                                                       |                 |
| Crystal system                    | Monoclinic                                                                                                      |                 |
| Space group                       | C2/c                                                                                                            |                 |
| Unit cell dimensions              | a = 38.096(5) Å                                                                                                 | α = 90°         |
|                                   | b = 42.405(5) Å                                                                                                 | β = 111.252(7)° |
|                                   | c = 15.0046(18) Å                                                                                               | γ = 90°         |
| Volume                            | 22591(5) Å <sup>3</sup>                                                                                         |                 |
| Z                                 | 4                                                                                                               |                 |
| Density (calculated)              | 1.395 Mg/m <sup>3</sup>                                                                                         |                 |
| Absorption coefficient            | 3.197 mm <sup>-1</sup>                                                                                          |                 |
| F(000)                            | 9768                                                                                                            |                 |
| Crystal size                      | 0.630 x 0.490 x 0.330 mm <sup>3</sup>                                                                           |                 |
| Theta range for data collection   | 2.927 to 54.497°                                                                                                |                 |
| Index ranges                      | -46 ≤ h ≤ 46, -51 ≤ k ≤ 51, -18 ≤ l ≤ 17                                                                        |                 |
| Reflections collected             | 115518                                                                                                          |                 |
| Independent reflections           | 21148 [R(int) = 0.1060]                                                                                         |                 |
| Completeness to theta = 53.594°   | 99.9 %                                                                                                          |                 |
| Absorption correction             | Semi-empirical from equivalents                                                                                 |                 |
| Max. and min. transmission        | 0.751 and 0.339                                                                                                 |                 |
| Refinement method                 | Full-matrix least-squares on F <sup>2</sup>                                                                     |                 |
| Data / restraints / parameters    | 21148 / 218 / 1058                                                                                              |                 |
| Goodness-of-fit on F <sup>2</sup> | 1.114                                                                                                           |                 |
| Final R indices [I > 2σ(I)]       | R1 = 0.1186, wR2 = 0.3531                                                                                       |                 |
| R indices (all data)              | R1 = 0.1419, wR2 = 0.3828                                                                                       |                 |
| Extinction coefficient            | 0.000093(18)                                                                                                    |                 |
| Largest diff. peak and hole       | 1.215 and -0.868 e.Å <sup>-3</sup>                                                                              |                 |

**Table 2: Crystal data and structure refinement for trefoil knot 2.**

|                                   |                                                                                                                 |                 |
|-----------------------------------|-----------------------------------------------------------------------------------------------------------------|-----------------|
| Empirical formula                 | C <sub>194</sub> H <sub>202</sub> F <sub>18</sub> N <sub>6</sub> O <sub>48</sub> Rh <sub>6</sub> S <sub>6</sub> |                 |
| Formula weight                    | 4537.42                                                                                                         |                 |
| Temperature                       | 173(2) K                                                                                                        |                 |
| Wavelength                        | 1.34138 Å                                                                                                       |                 |
| Crystal system                    | Monoclinic                                                                                                      |                 |
| Space group                       | C2/c                                                                                                            |                 |
| Unit cell dimensions              | a = 38.3335(18) Å                                                                                               | α = 90°         |
|                                   | b = 42.1187(18) Å                                                                                               | β = 111.437(2)° |
|                                   | c = 14.9706(7) Å                                                                                                | γ = 90°         |
| Volume                            | 22498.7(18) Å <sup>3</sup>                                                                                      |                 |
| Z                                 | 4                                                                                                               |                 |
| Density (calculated)              | 1.340 Mg/m <sup>3</sup>                                                                                         |                 |
| Absorption coefficient            | 3.170 mm <sup>-1</sup>                                                                                          |                 |
| F(000)                            | 9280                                                                                                            |                 |
| Crystal size                      | 0.530 x 0.220 x 0.120 mm <sup>3</sup>                                                                           |                 |
| Theta range for data collection   | 2.943 to 54.989°.                                                                                               |                 |
| Index ranges                      | -46 ≤ h ≤ 46, -51 ≤ k ≤ 51, -18 ≤ l ≤ 16                                                                        |                 |
| Reflections collected             | 139566                                                                                                          |                 |
| Independent reflections           | 21379 [R(int) = 0.1052]                                                                                         |                 |
| Completeness to theta = 53.594°   | 100.0 %                                                                                                         |                 |
| Absorption correction             | Semi-empirical from equivalents                                                                                 |                 |
| Max. and min. transmission        | 0.751 and 0.482                                                                                                 |                 |
| Refinement method                 | Full-matrix least-squares on F <sup>2</sup>                                                                     |                 |
| Data / restraints / parameters    | 21379 / 242 / 1056                                                                                              |                 |
| Goodness-of-fit on F <sup>2</sup> | 1.125                                                                                                           |                 |
| Final R indices [I > 2σ(I)]       | R1 = 0.1263, wR2 = 0.3739                                                                                       |                 |
| R indices (all data)              | R1 = 0.1513, wR2 = 0.3995                                                                                       |                 |
| Extinction coefficient            | n/a                                                                                                             |                 |
| Largest diff. peak and hole       | 2.130 and -1.479 e.Å <sup>-3</sup>                                                                              |                 |

**Table 3: Crystal data and structure refinement for one-dimension chain 3.**

|                                   |                                             |                            |
|-----------------------------------|---------------------------------------------|----------------------------|
| Empirical formula                 | $C_{60}H_{72}F_6N_2O_{17}Rh_2S_2$           |                            |
| Formula weight                    | 1477.13                                     |                            |
| Temperature                       | 173(2) K                                    |                            |
| Wavelength                        | 1.34138 Å                                   |                            |
| Crystal system                    | Monoclinic                                  |                            |
| Space group                       | C2/c                                        |                            |
| Unit cell dimensions              | a = 23.3272(13) Å                           | $\alpha = 90^\circ$        |
|                                   | b = 25.9944(13) Å                           | $\beta = 121.863(2)^\circ$ |
|                                   | c = 15.3921(7) Å                            | $\gamma = 90^\circ$        |
| Volume                            | 7927.0(7) Å <sup>3</sup>                    |                            |
| Z                                 | 4                                           |                            |
| Density (calculated)              | 1.238 Mg/m <sup>3</sup>                     |                            |
| Absorption coefficient            | 2.996 mm <sup>-1</sup>                      |                            |
| F(000)                            | 3032                                        |                            |
| Crystal size                      | 0.550 x 0.130 x 0.080 mm <sup>3</sup>       |                            |
| Theta range for data collection   | 2.929 to 54.498°.                           |                            |
| Index ranges                      | -28 ≤ h ≤ 28, -31 ≤ k ≤ 31, -15 ≤ l ≤ 18    |                            |
| Reflections collected             | 25891                                       |                            |
| Independent reflections           | 7406 [R(int) = 0.0764]                      |                            |
| Completeness to theta = 53.594°   | 99.6 %                                      |                            |
| Absorption correction             | Semi-empirical from equivalents             |                            |
| Max. and min. transmission        | 0.751 and 0.358                             |                            |
| Refinement method                 | Full-matrix least-squares on F <sup>2</sup> |                            |
| Data / restraints / parameters    | 7406 / 92 / 365                             |                            |
| Goodness-of-fit on F <sup>2</sup> | 1.082                                       |                            |
| Final R indices [I > 2σ(I)]       | R1 = 0.0904, wR2 = 0.2513                   |                            |
| R indices (all data)              | R1 = 0.0990, wR2 = 0.2646                   |                            |
| Extinction coefficient            | n/a                                         |                            |
| Largest diff. peak and hole       | 2.053 and -1.308 e.Å <sup>-3</sup>          |                            |

**Table 4: Crystal data and structure refinement for one-dimension chain 4.**

|                                   |                                                                                                              |                |
|-----------------------------------|--------------------------------------------------------------------------------------------------------------|----------------|
| Empirical formula                 | C <sub>62</sub> H <sub>59</sub> F <sub>6</sub> N <sub>3</sub> O <sub>12</sub> Rh <sub>2</sub> S <sub>2</sub> |                |
| Formula weight                    | 1422.06                                                                                                      |                |
| Temperature                       | 173(2) K                                                                                                     |                |
| Wavelength                        | 1.34138 Å                                                                                                    |                |
| Crystal system                    | Monoclinic                                                                                                   |                |
| Space group                       | C2/c                                                                                                         |                |
| Unit cell dimensions              | a = 29.466(3) Å                                                                                              | α = 90°        |
|                                   | b = 8.3663(8) Å                                                                                              | β = 95.104(4)° |
|                                   | c = 25.342(2) Å                                                                                              | γ = 90°        |
| Volume                            | 6222.6(10) Å <sup>3</sup>                                                                                    |                |
| Z                                 | 4                                                                                                            |                |
| Density (calculated)              | 1.518 Mg/m <sup>3</sup>                                                                                      |                |
| Absorption coefficient            | 3.718 mm <sup>-1</sup>                                                                                       |                |
| F(000)                            | 2896.0                                                                                                       |                |
| Crystal size                      | 0.510 x 0.190 x 0.080 mm <sup>3</sup>                                                                        |                |
| Theta range for data collection   | 3.838 to 56.988°                                                                                             |                |
| Index ranges                      | -36 ≤ h ≤ 36, -10 ≤ k ≤ 10, -31 ≤ l ≤ 28                                                                     |                |
| Reflections collected             | 24535                                                                                                        |                |
| Independent reflections           | 6369 [R <sub>int</sub> = 0.0973, R <sub>sigma</sub> = 0.0681]                                                |                |
| Completeness to theta = 53.594°   | 100 %                                                                                                        |                |
| Absorption correction             | Semi-empirical from equivalents                                                                              |                |
| Max. and min. transmission        | 0.751 and 0.519                                                                                              |                |
| Refinement method                 | Full-matrix least-squares on F <sup>2</sup>                                                                  |                |
| Data / restraints / parameters    | 6369 / 0 / 384                                                                                               |                |
| Goodness-of-fit on F <sup>2</sup> | 1.049                                                                                                        |                |
| Final R indices [I > 2σ(I)]       | R1 = 0.0458, wR2 = 0.1110                                                                                    |                |
| R indices (all data)              | R1 = 0.0670, wR2 = 0.1216                                                                                    |                |
| Extinction coefficient            | n/a                                                                                                          |                |
| Largest diff. peak and hole       | 0.88 and -0.54 e Å <sup>-3</sup>                                                                             |                |
